# Supplementary material for: Three-dimensional electrode characteristics and size/shape flexibility of coaxial-fibers bundled batteries
Source: Royal Society of Chemistry journal article supplement (doi:10.1039/d4ee00283k), 2024-01-01
Supplement: d4ee00283k2.pdf [file d4ee00283k2.pdf]

Supporting Information for

# Three-Dimensional Electrode Characteristics and Size / Shape Flexibility for Coaxial-Fibers Bundled Batteries

Yoshinari Makimura, Chikaaki Okuda, Toshihisa Munekata, Azusa Tsukigase, Hideaki Oka, Tooru Saeki, Ryohei Morimoto, Megumi Sasaki, Hiroyuki Nakano, Yuichi Ito, Mamoru Mizutani, Tsuyoshi Sasaki

Toyota Central R&D Labs., Inc., Nagakute, Aichi 480-1192, Japan.

## Corresponding Author

Email: ymakimura@mosk.tytlabs.co.jp.

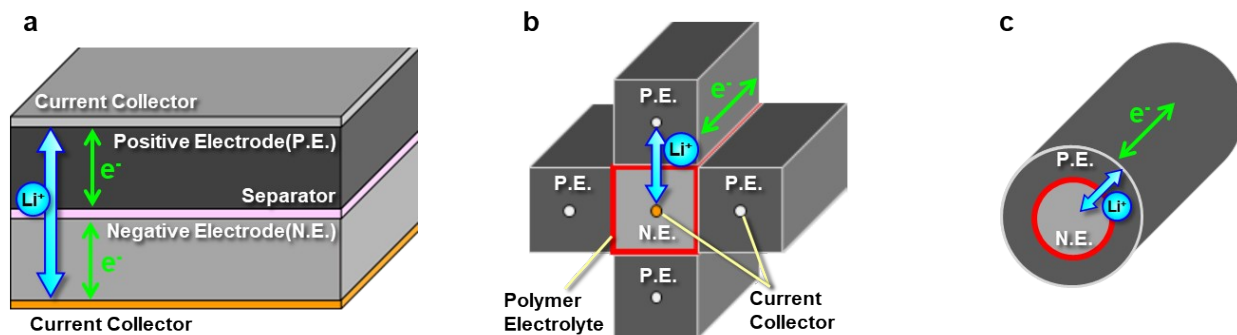

**Figure S1.** Schematic illustrations of achieving high electrode-area with high energy density by innovating the electrode geometry: (a) conventional sandwich-type internal structure in which positive and negative electrode sheets are stacked alternately with the separator; (b) cross-sectional image of a grid pattern of the positive and negative electrode rods arranged alternately; and (c) single coaxial-fiber electrode.

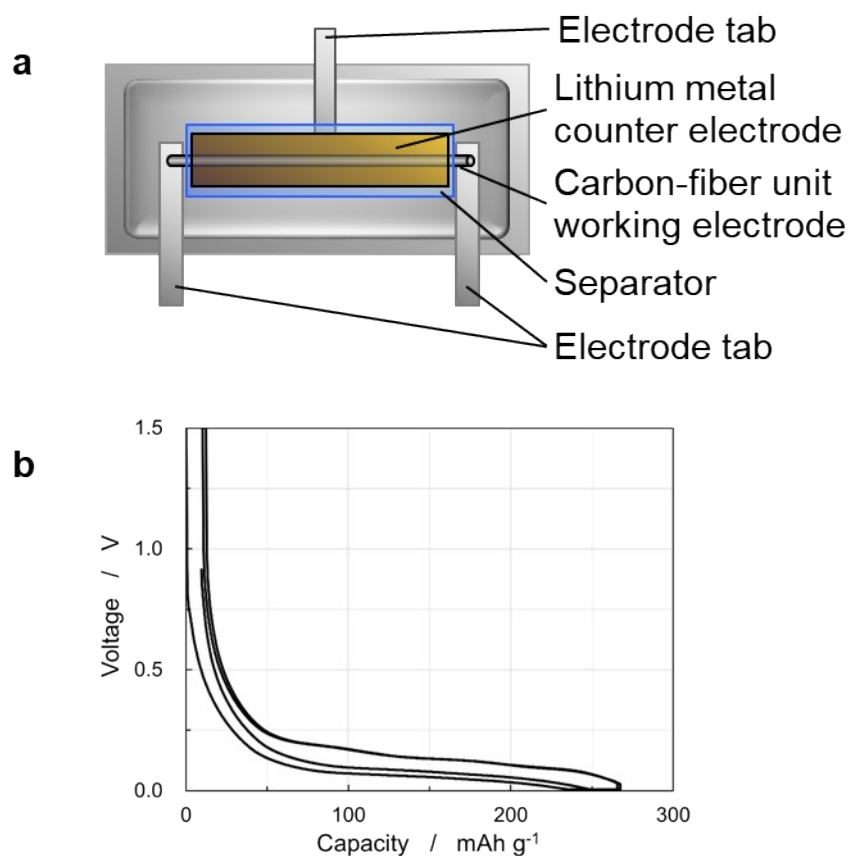

**Figure S2.** (a) Three-electrode pouch-cell with 130 mm long carbon-fiber unit sandwiched between 120 mm long lithium metal sheets from both sides via a polyethylene separator to examine electrochemical behavior and change in resistance at 1 kHz. (b) Voltage profiles of the pouch-cell's carbon-fiber unit.

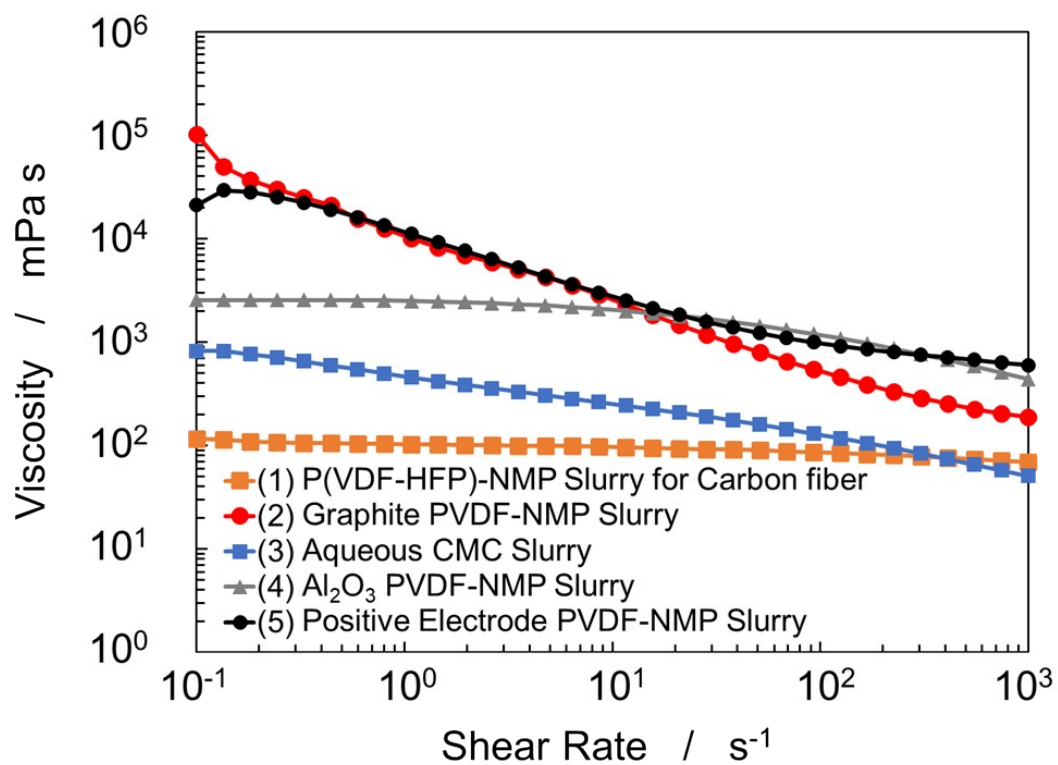

**Figure S3.** Viscosity for the slurries used for the electrodes or separator coating as a function of the shear rate to fabricate coaxial-fiber structure.

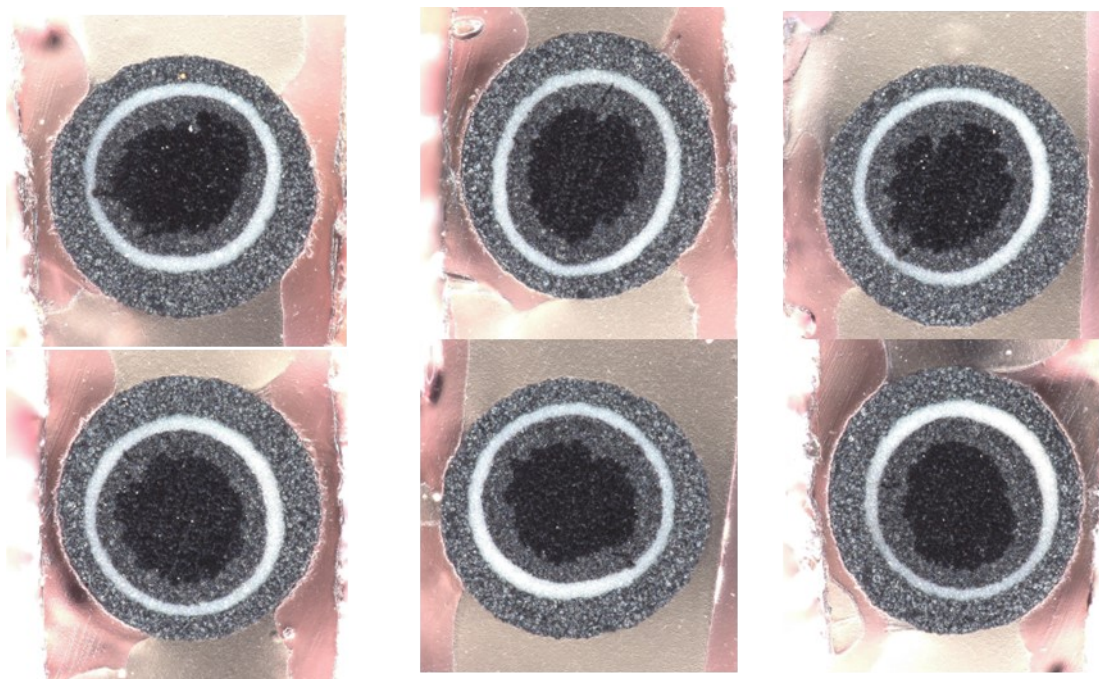

**Figure S4.** Cross-sectional images of a single coaxial-fiber electrode observed at several locations using an optical microscope.

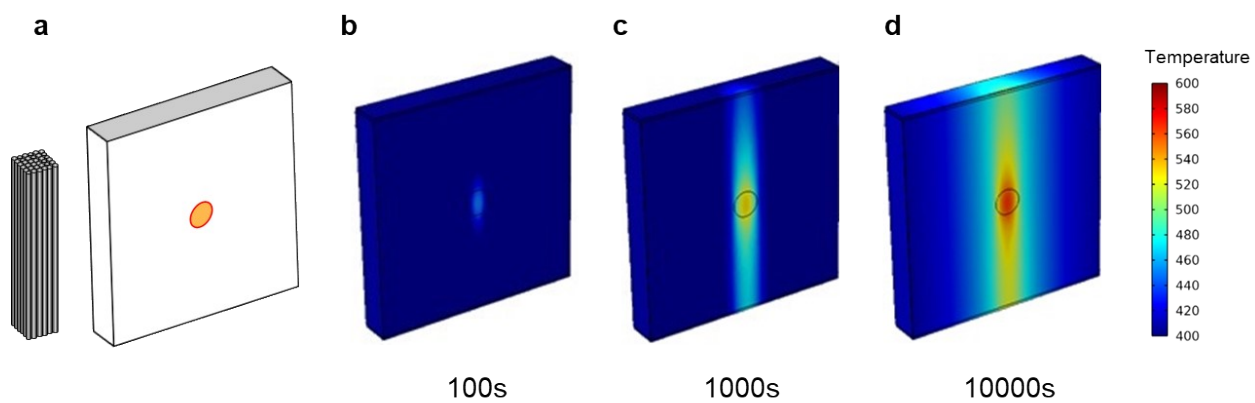

**Figure S5.** Battery model and simulated temperature distribution of the fiber-bundled structure

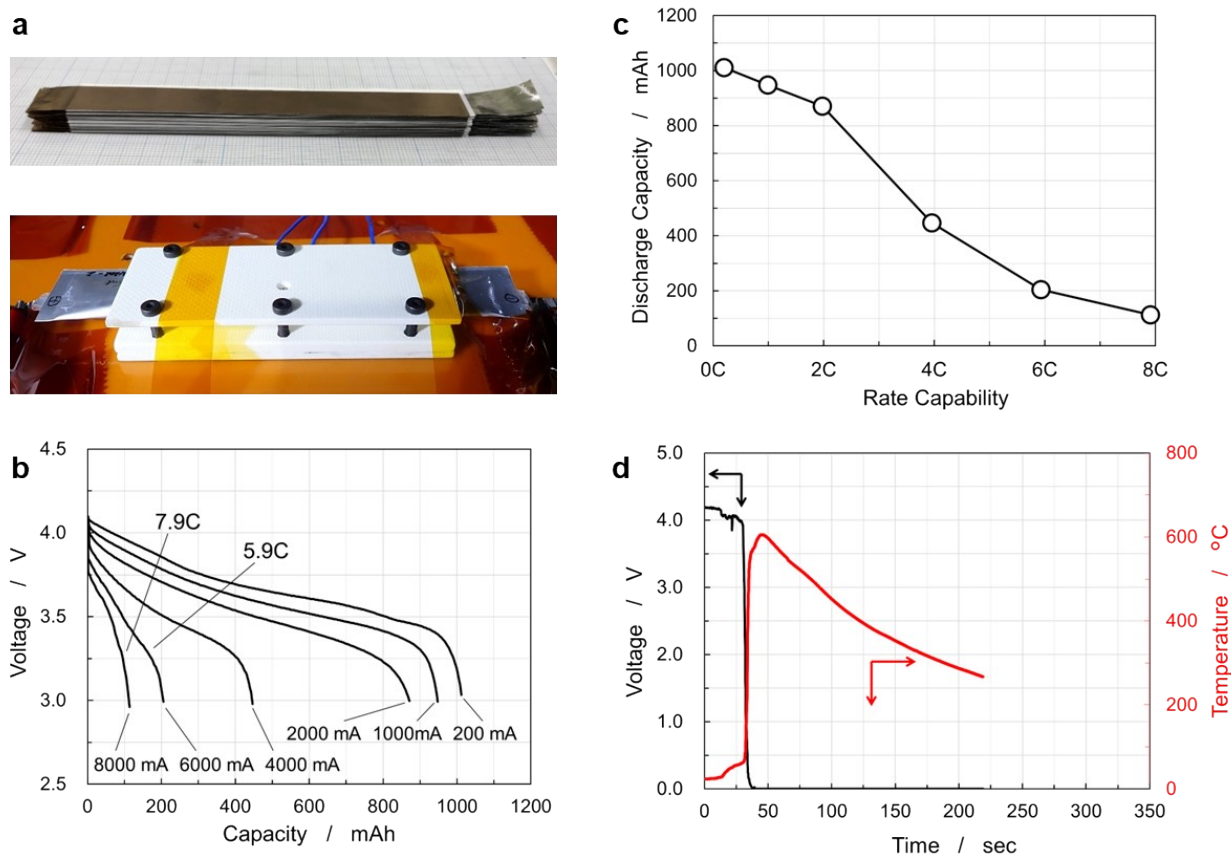

**Figure S6.** Sandwich-type multi-sheet battery: (a) photographs of the sandwich-type structure and the sealed battery; (b) discharge curves and (c) discharge capacity of the battery during a rate capability test; and (d) changes in voltage and temperature of the battery during the nail penetration test.

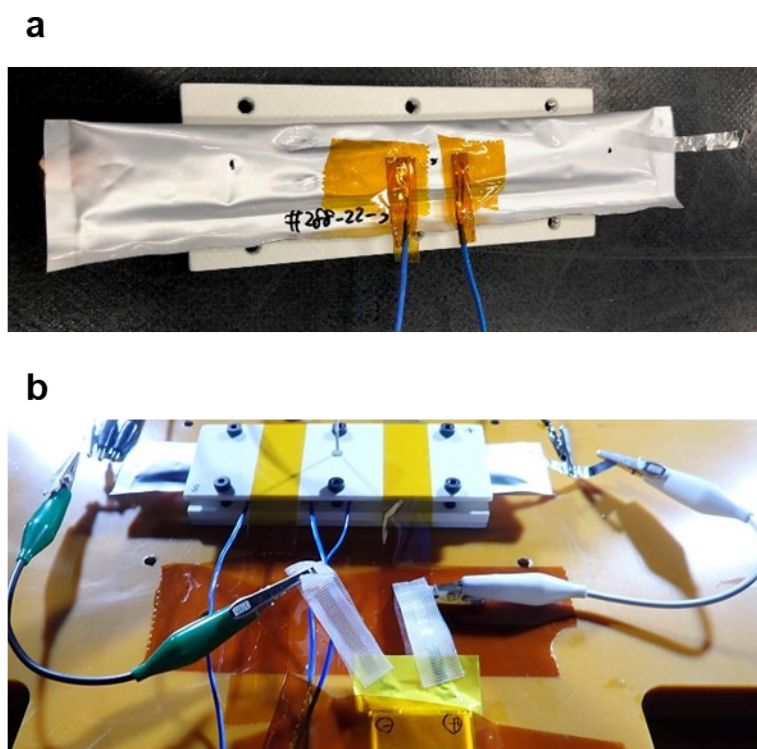

**Figure S7.** Photographs of the (a) CFBB consisting of 288 fiber electrodes and (b) experimental setup of the nail penetration test of the CFBB connected in parallel with 1100 mAh-class commercial lithium-ion battery.



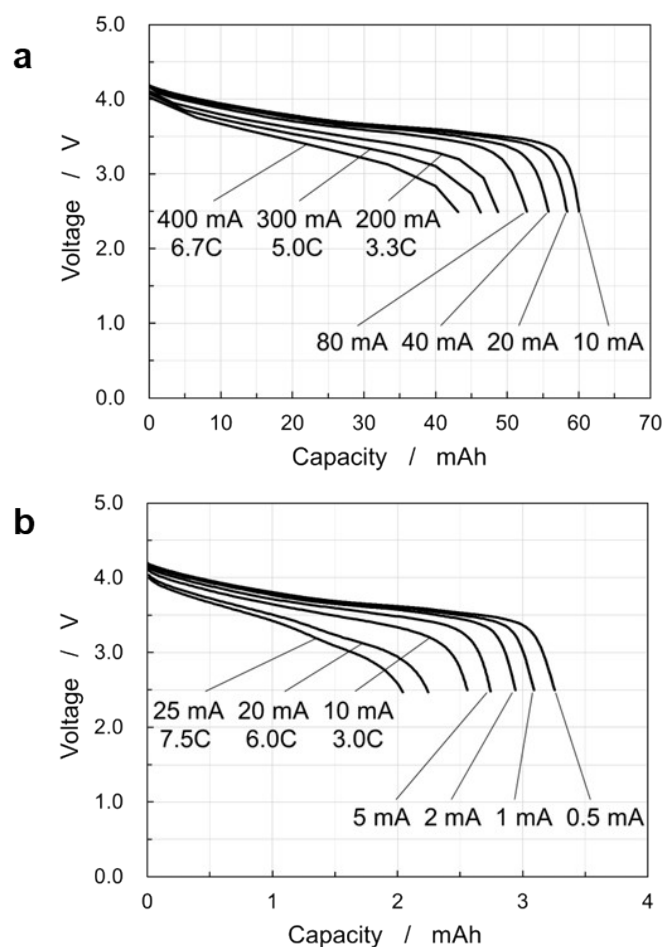

**Figure S8.** Discharge curves of 60 or 3.3 mAh-class CFBB during the rate capability test: (a) 60 mAh-class CFBB was charged at 10 mA to 4.2 V, held at the voltage for 2 h, and discharged at various currents from 10 to 400 mA at 20 °C; (b) 3.3 mAh-class CFBB was charged at 1 mA to 4.2 V, held at the voltage for 2 h, and discharged at various currents from 0.5 to 25 mA at 20 °C.

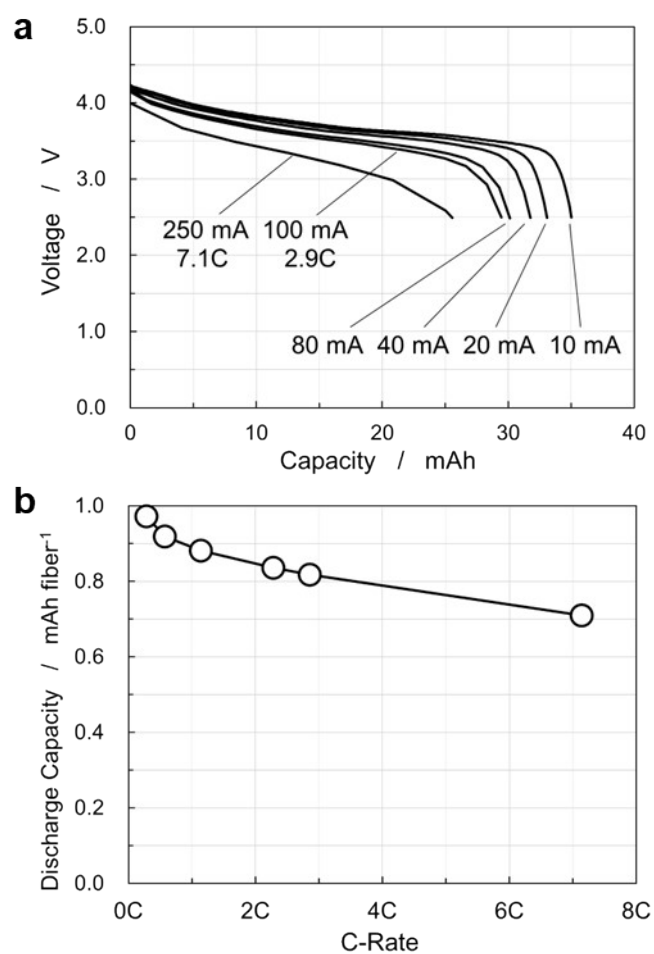

**Figure S9.** (a) Discharge curves of high energy-density CFBB consisting of 36 fiber electrodes during the rate-capability test. The cell was charged at 10 mA to 4.2 V, held at the voltage for 2 h, and discharged at various currents from 10 to 250 mA at 20 °C. (b) Discharge capacities of the CFBB normalized by the values per a single coaxial-fiber electrode during the rate-capability test.

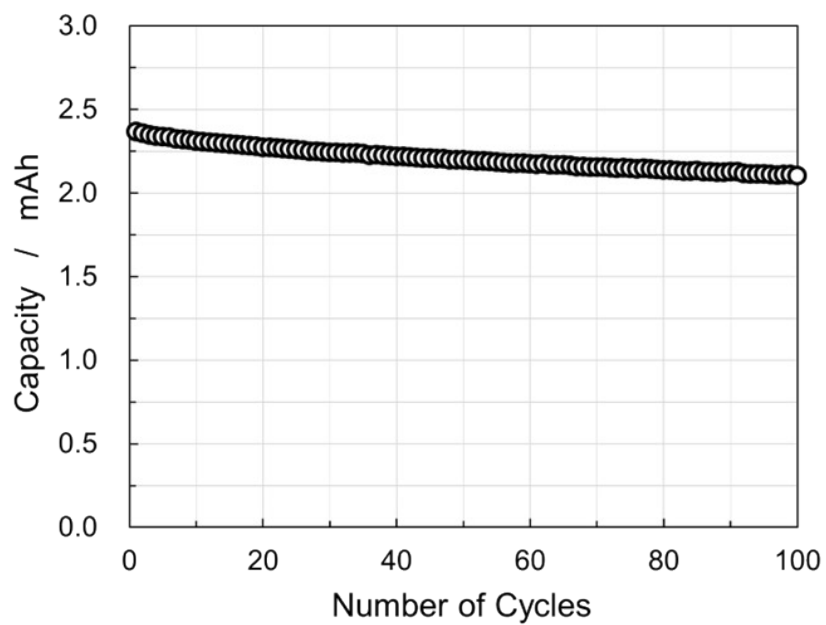

**Figure S10.** Capacity retention for the 3.3 mAh-class CFBB operated in a voltage window of 3.0–4.1 V at 0.7C-rate at 20 °C.

**Supplementary Video 1.** Drone flight with four 225 mAh-class coaxial-fiber bundled batteries (CFBBs).

**Table S1.** Electrode and battery-design parameters to estimate energy-densities and electrode-areas.

|                                                  | Single Coaxial-Fiber Structure                                                | Conventional Sandwich-Type Structure |
|--------------------------------------------------|-------------------------------------------------------------------------------|--------------------------------------|
| Positive Electrode                               | Active Material / Acetylene black / PVDF (88 / 6 / 6; wt%)                    |                                      |
| Active Material                                  | $\text{LiNi}_{1/3}\text{Co}_{1/3}\text{Mn}_{1/3}\text{O}_2$                   |                                      |
| Electrode Density                                | $2.8 \text{ g cm}^{-3}$                                                       |                                      |
| Current Collector                                | Aluminum Sheet ( $7\mu\text{m} \times 0.5 \times 0.25$ )                      | Aluminum Sheet ( $15 \mu\text{m}$ )  |
| Discharge Capacity                               | $150 \text{ mAh g}^{-1}$                                                      |                                      |
| Operating Voltage                                | $3.7 \text{ V vs. Li}^+/\text{Li}$                                            |                                      |
| Negative Electrode                               | Carbon Fiber                                                                  | Graphite / Binder (98 / 2; wt%)      |
| Active Material                                  | Carbon Fiber                                                                  | Graphite                             |
| Electrode Density                                | $1.86 \text{ g cm}^{-3}$                                                      | $1.6 \text{ g cm}^{-3}$              |
| Current Collector                                | None                                                                          | Copper Sheet ( $10 \mu\text{m}$ )    |
| Thickness                                        | $20 - 500 \mu\text{m}$ (radius)                                               | $20 - 500 \mu\text{m}$ (thickness)   |
| Discharge Capacity                               | $330 \text{ mAh g}^{-1}$                                                      |                                      |
| Operating Voltage                                | $0.1 \text{ V vs. Li}^+/\text{Li}$                                            |                                      |
| Separator                                        | $\text{Al}_2\text{O}_3$ / PVDF (90 / 10; wt%)                                 | Polyethylene                         |
| Thickness                                        | $15 \mu\text{m}$                                                              | $15 \mu\text{m}$                     |
| Electrolyte                                      | $1\text{M LiPF}_6$ dissolved in EC / DMC / EMC (3 / 4 / 3 by volume) solution |                                      |
| Capacity-Ratio of Negative to Positive Electrode | 1.1                                                                           |                                      |

**Table S2.** Sizes with standard deviation  $\sigma$  of each component in a single coaxial-fiber electrode.

| Size ( $\mu\text{m}$ )          | No. 1 | No. 2 | No. 3 | No. 4 | No. 5 | No. 6 | Average |
|---------------------------------|-------|-------|-------|-------|-------|-------|---------|
| Diameter of negative electrode  | 222.5 | 227.2 | 224.1 | 228.6 | 230.8 | 222.2 | 225.9   |
| Standard deviation $\sigma$     | 19.9  | 15.7  | 23.0  | 24.9  | 24.0  | 36.8  |         |
| Thickness of separator          | 16.6  | 16.6  | 17.2  | 17.1  | 17.1  | 17.9  | 17.1    |
| Standard deviation $\sigma$     | 2.9   | 2.1   | 3.2   | 3.4   | 3.3   | 4.9   |         |
| Thickness of positive electrode | 49.6  | 44.2  | 46.9  | 44.6  | 44.0  | 44.0  | 45.6    |
| Standard deviation $\sigma$     | 10.0  | 7.4   | 9.7   | 9.3   | 7.5   | 7.2   |         |

**Table S3.** Size, weight, and energy density of the CFBBs. The weight of electrolyte in the CFBBs was calculated from the volume of voids within the CFBBs and the specific gravity of the electrolyte.

| Number of<br>fiber electrodes<br>in CFBBs | Size of electrodes |               |                | Weight<br>(g) | Discharge capacity<br>(mAh) |                                | Energy Density                      |                                       |
|-------------------------------------------|--------------------|---------------|----------------|---------------|-----------------------------|--------------------------------|-------------------------------------|---------------------------------------|
|                                           | Height<br>(mm)     | Width<br>(mm) | Length<br>(mm) |               | Battery                     | A single<br>fiber<br>electrode | Volumetric<br>(Wh L <sup>-1</sup> ) | Gravimetric<br>(Wh kg <sup>-1</sup> ) |
| 4                                         | 0.326              | 0.938         | 98             | 0.078         | 3.3                         | 0.830                          | 410                                 | 158                                   |
| 18                                        | 0.349              | 4.139         | 98             | 0.349         | 14.0                        | 0.856                          | 403                                 | 163                                   |
| 72                                        | 1.280              | 4.523         | 98             | 1.398         | 60.1                        | 0.834                          | 392                                 | 159                                   |
| 288                                       | 4.903              | 4.474         | 98             | 5.447         | 222.1                       | 0.771                          | 382                                 | 151                                   |
| 36                                        | 0.583              | 4.597         | 98             | 0.673         | 35.0                        | 0.973                          | 493                                 | 192                                   |

**Table S4.** Energy densities and high-rate capabilities for commercial lithium-ion batteries.

| Ref. | Model No.    | Cell format | Capacity | Energy density         |                         | Maximum current                                 |                 |
|------|--------------|-------------|----------|------------------------|-------------------------|-------------------------------------------------|-----------------|
|      |              |             |          | Volumetric             | Gravimetric             | Charging                                        | Discharging     |
| —    | LP603449     | Pouch       | 1100 mAh | 414 Wh L <sup>-1</sup> | 185 Wh kg <sup>-1</sup> | 1.1 A (1C-rate)                                 | 2.2 A (2C-rate) |
| 48   | INR18650-MJ1 | 18650       | 3500 mAh | 736 Wh L <sup>-1</sup> | 260 Wh kg <sup>-1</sup> | 3.4 A (1C-rate)                                 | 10 A (3C-rate)  |
|      |              |             |          |                        |                         | Capacity retention on<br>4C-rate charge at 25°C |                 |
| 49   | INR18650-35E | 18650       | 3367 mAh | 715 Wh L <sup>-1</sup> | 251 Wh kg <sup>-1</sup> | 29%                                             |                 |
| 49   | NCR18650GA   | 18650       | 3277 mAh | 720 Wh L <sup>-1</sup> | 261 Wh kg <sup>-1</sup> | 25%                                             |                 |
| 49   | INR21700-50E | 21700       | 4921 mAh | 722 Wh L <sup>-1</sup> | 259 Wh kg <sup>-1</sup> | 21%                                             |                 |
| 49   | INR21700M50T | 21700       | 4743 mAh | 709 Wh L <sup>-1</sup> | 255 Wh kg <sup>-1</sup> | 22%                                             |                 |



**Table S5.** Estimated Joule heat and temperature rise of carbon fibers during high-rate discharge.

| Number of fiber electrodes | Carbon fibers in CFBBs |                          | Rate capability test |              |                          |                      | Joule heat (J) | Temp. rise (°C)** |
|----------------------------|------------------------|--------------------------|----------------------|--------------|--------------------------|----------------------|----------------|-------------------|
|                            | Total Weight (mg)      | Resistance ( $\Omega$ )* | C-Rate               | Current (mA) | Discharge Capacity (mAh) | Discharge time (sec) |                |                   |
| 4                          | 11.37                  | 8.662                    | 7.5C                 | 25           | 2.04                     | 294                  | 1.59           | 197               |
| 18                         | 51.16                  | 1.925                    | 6.6C                 | 99           | 10.3                     | 375                  | 7.07           | 195               |
| 72                         | 204.62                 | 0.481                    | 6.7C                 | 400          | 43.1                     | 388                  | 29.88          | 206               |
| 288                        | 818.50                 | 0.120                    | 7.6C                 | 1700         | 180.4                    | 382                  | 132.85         | 229               |
| 36                         | 102.31                 | 0.962                    | 7.1C                 | 250          | 25.6                     | 369                  | 22.14          | 305               |

\* The volume resistivity of the carbon fiber in the charged state of SOC50% was assumed to be  $5.44 \times 10^{-4} \Omega \text{ cm}$  since the volume resistivity of the carbon fiber was  $3.4 \times 10^{-3} \Omega \text{ cm}$ , and the 1 kHz resistance of the carbon fiber shown in Fig. 1(e) at SOC50% decreased to 16% of the initial value.

\*\* The temperature rise of the carbon fiber in CFBBs was estimated by assuming the specific heat capacity of  $0.71 \text{ J g}^{-1}\text{K}^{-1}$  equivalent to that of graphite.

**Table S6.** Charge and discharge currents of the rate-capability tests of coaxial-fiber bundled batteries (CFBBs) and their C-rates based on the discharge capacity at low-rate.

| Number of fiber electrodes in CFBBs | Capacity mAh | Low-rate charge-discharge |                       | Rate capability test                                                                  |                                                                                     |
|-------------------------------------|--------------|---------------------------|-----------------------|---------------------------------------------------------------------------------------|-------------------------------------------------------------------------------------|
|                                     |              | Charge mA (C-rate)        | Discharge mA (C-rate) | Charge mA (C-rate)                                                                    | Discharge mA (C-rate)                                                               |
| 4                                   | 3.3          | 1 (0.3C)                  | 0.5 (0.15C)           | 1 (0.3C)                                                                              | 0.5 (0.15C), 1 (0.3C), 2 (0.6C), 5 (1.5C), 10 (3.0C), 20 (6.0C), 25 (7.5C)          |
| 18                                  | 15           | 0.5 (0.03C)               | 0.5 (0.03C)           | 2 (0.13C)                                                                             | 1 (0.07C), 5 (0.3C), 10 (0.7C), 20 (1.3C), 40(2.7C), 60 (4.0C), 99 (6.6C)           |
|                                     |              |                           |                       | 1 (0.07C), 5 (0.3C), 10 (0.7C), 20 (1.3C), 40 (2.7C), 60 (4.0C), 80 (5.3C), 99 (6.6C) | 0.5 (0.03C)                                                                         |
| 72                                  | 60           | 10 (0.17C)                | 10 (0.17C)            | 10 (0.17C)                                                                            | 10 (0.17C), 20 (0.3C), 40 (0.7C), 80 (1.3C), 200 (3.3C), 300 (5.0C), 400 (6.7C)     |
| 288                                 | 225          | 20 (0.09C)                | 20 (0.09C)            | 20 (0.09C)                                                                            | 20 (0.09C), 50 (0.2C), 100 (0.4C), 400 (1.8C), 800 (3.6C), 1200 (5.4C), 1700 (7.6C) |
| 36                                  | 35           | 10 (0.29C)                | 10 (0.29C)            | 10 (0.29C)                                                                            | 10 (0.29C), 20 (0.6C), 40 (1.1C), 80 (2.3C), 100 (2.9C), 250 (7.1C)                 |
